# Supplementary material for: Bilobar spreading of colorectal liver metastases does not significantly affect survival after R0 resection in the era of interdisciplinary multimodal treatment
Source: Springer Nature journal article supplement (doi:10.1007/s00384-012-1455-1), 2012-03-20

# OS lobes p=0.0979

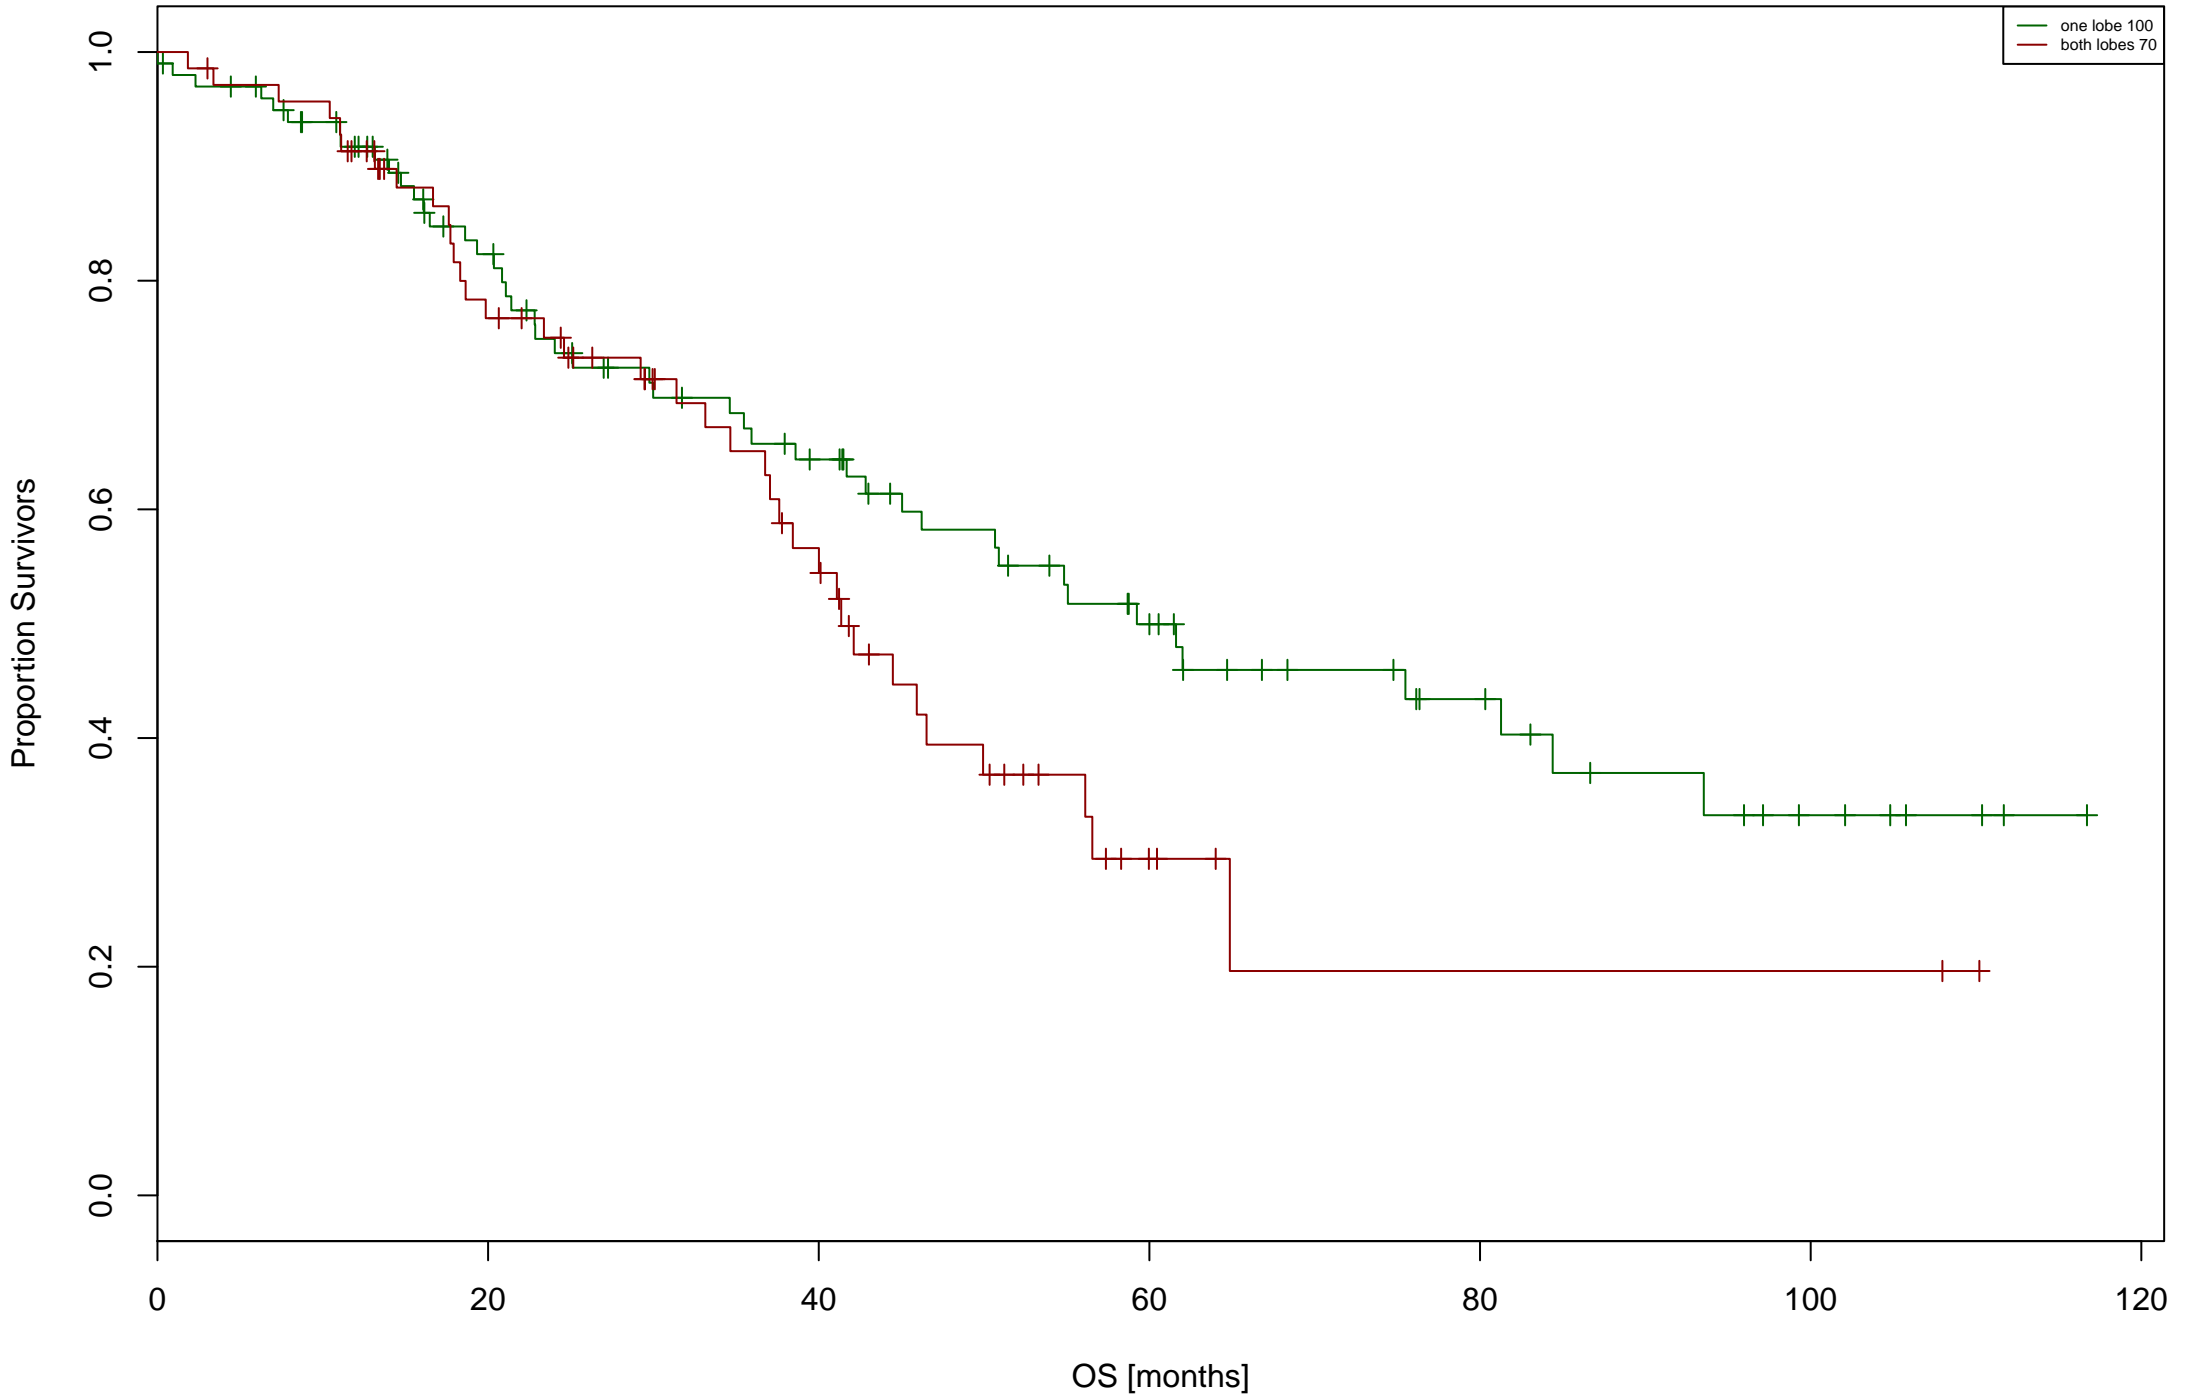

Supplement: MOESM1 [file 8367452]
